# Supplementary material for: Simulation of radon-222 with the GEOS-Chem global model: emissions, seasonality, and convective transport
Source: Copernicus journal article supplement (doi:10.5194/acp-21-1861-2021), 2021-02-10
Supplement: Supplementary file 1 [file acp-21-1861-2021-supplement.pdf]

Supplement of Atmos. Chem. Phys., 21, 1861–1887, 2021  
<https://doi.org/10.5194/acp-21-1861-2021-supplement>  
© Author(s) 2021. This work is distributed under  
the Creative Commons Attribution 4.0 License.

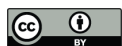

*Supplement of*

## **Simulation of radon-222 with the GEOS-Chem global model: emissions, seasonality, and convective transport**

**Bo Zhang et al.**

*Correspondence to:* Hongyu Liu ([hongyu.liu-1@nasa.gov](mailto:hongyu.liu-1@nasa.gov)) and Bo Zhang ([bo.zhang@nianet.org](mailto:bo.zhang@nianet.org))

The copyright of individual parts of the supplement might differ from the CC BY 4.0 License.

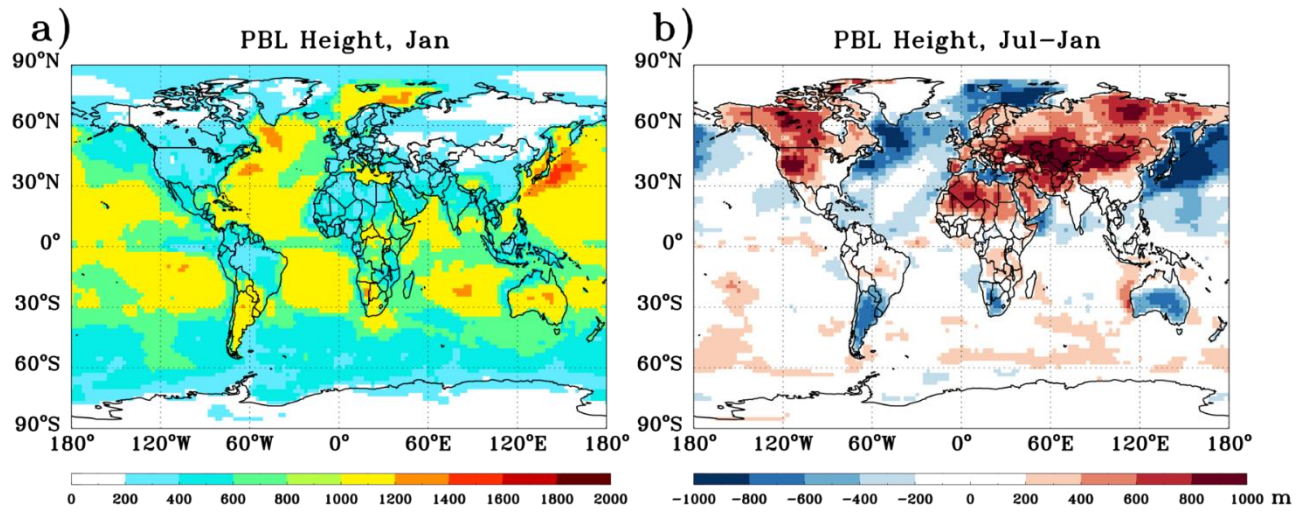

5

**Figure S1.** Monthly mean planetary boundary layer height (m) in MERRA for (a) January and (b) the difference between July and January 2013.

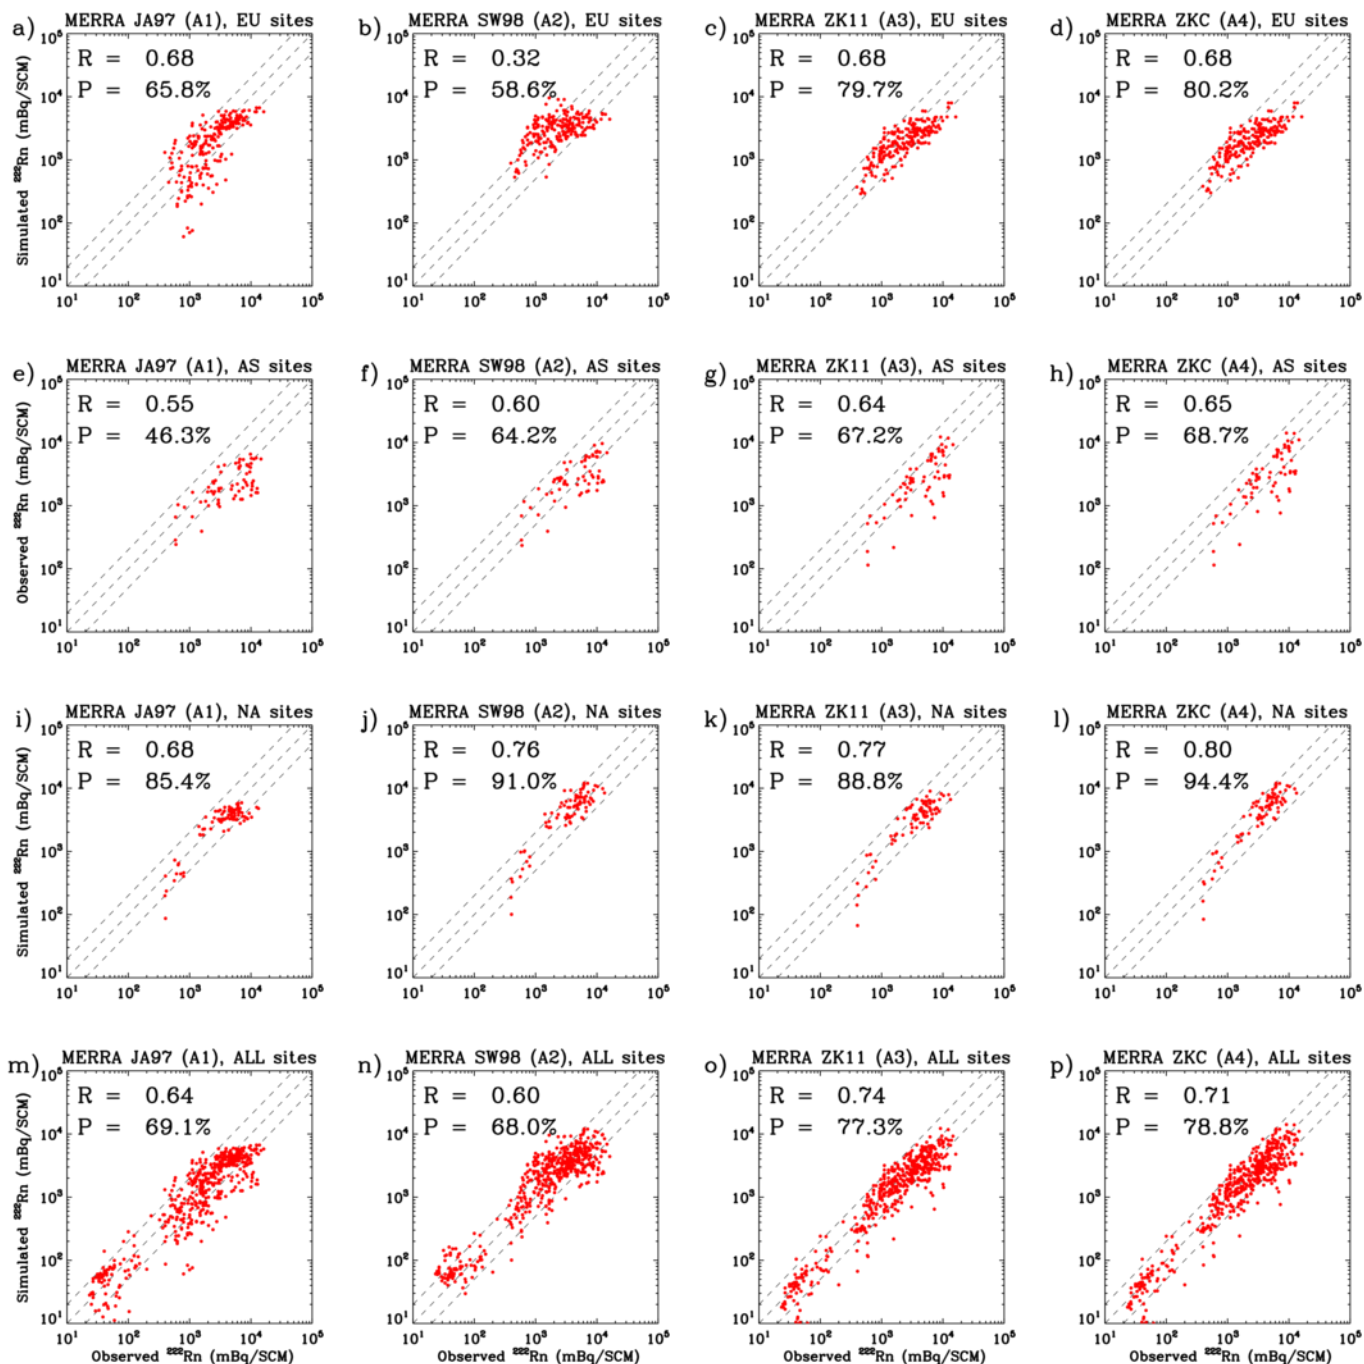

5 **Figure S2.** Same as Fig. 6, but the measured  $^{222}\text{Rn}$  concentrations at European sites are applied with scaling factors suggested by Schmithüsen et al. (2017).

5

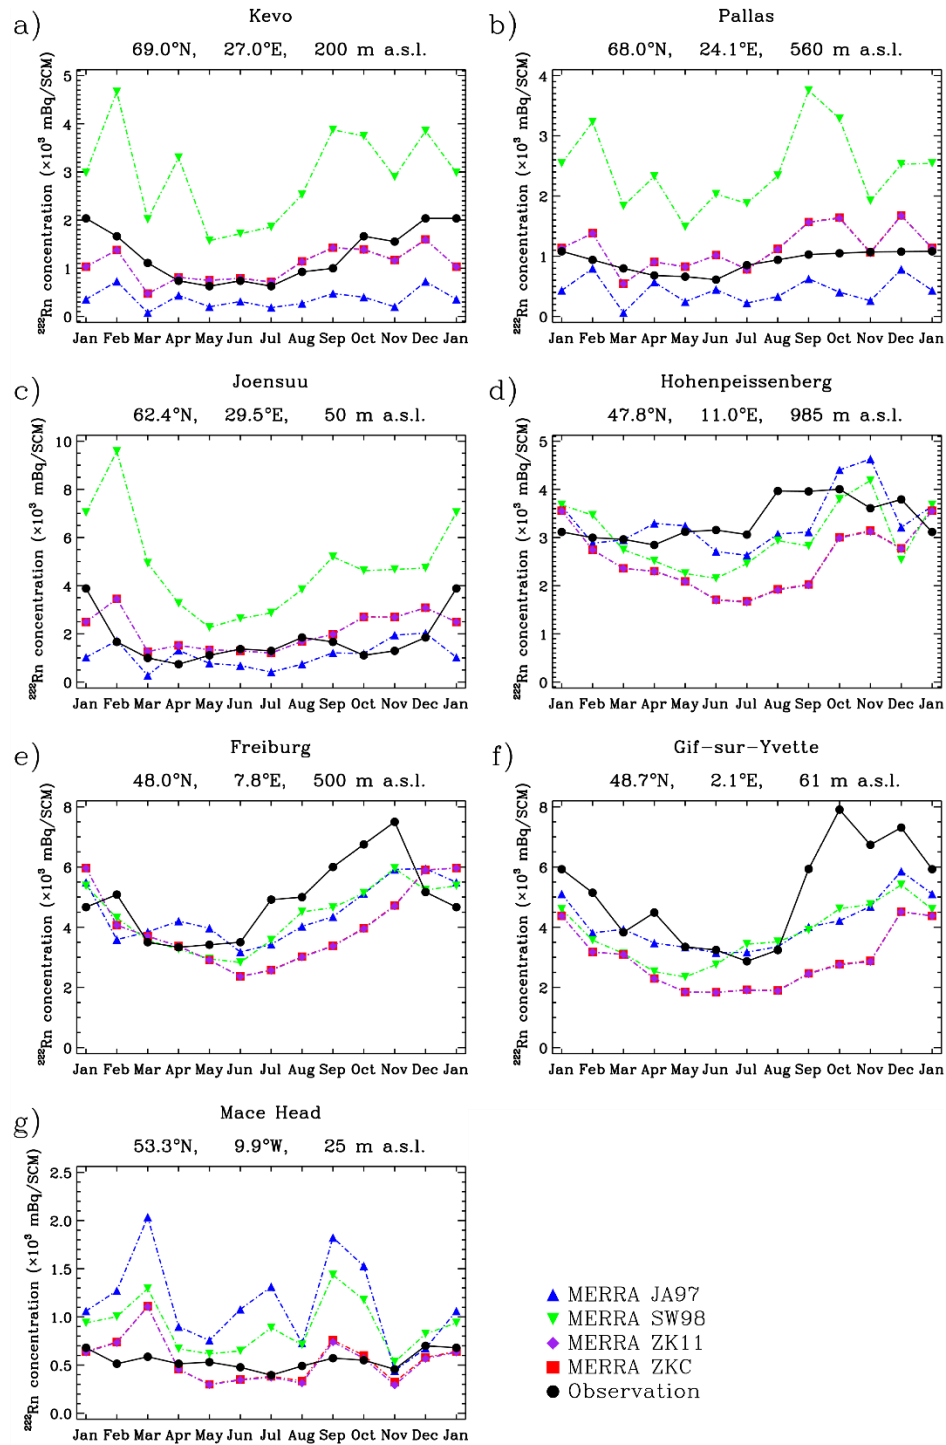

15

20

25

30

**Figure S3.** Same as Fig. 8, but the measured  $^{222}\text{Rn}$  concentrations at European sites are applied with scaling factors suggested by Schmithüsen et al. (2017).

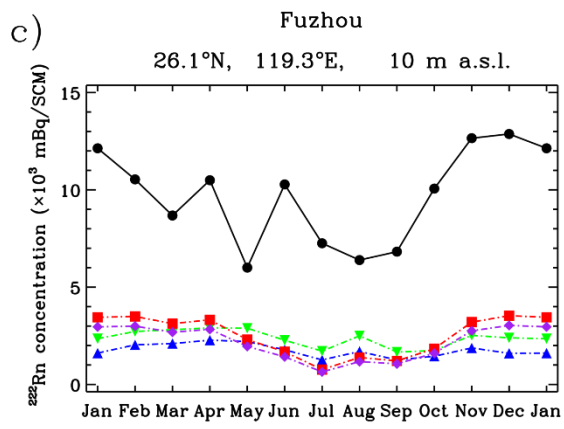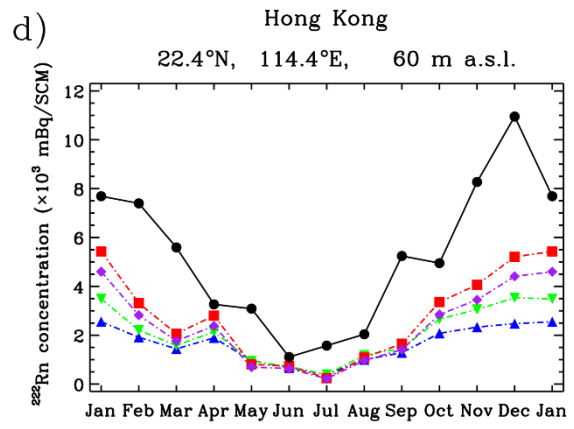

**Figure S4.** Same as Fig. 9c and 9d, but the simulated  $^{222}\text{Rn}$  concentrations are sampled at the gridboxes corresponding to the site locations.
